# Supplementary material for: The global and promoter-centric 3D genome organization temporally resolved during a circadian cycle
Source: PubMed Central journal article supplement (PMC8185950; doi:10.1186/s13059-021-02374-3), 2021-06-08

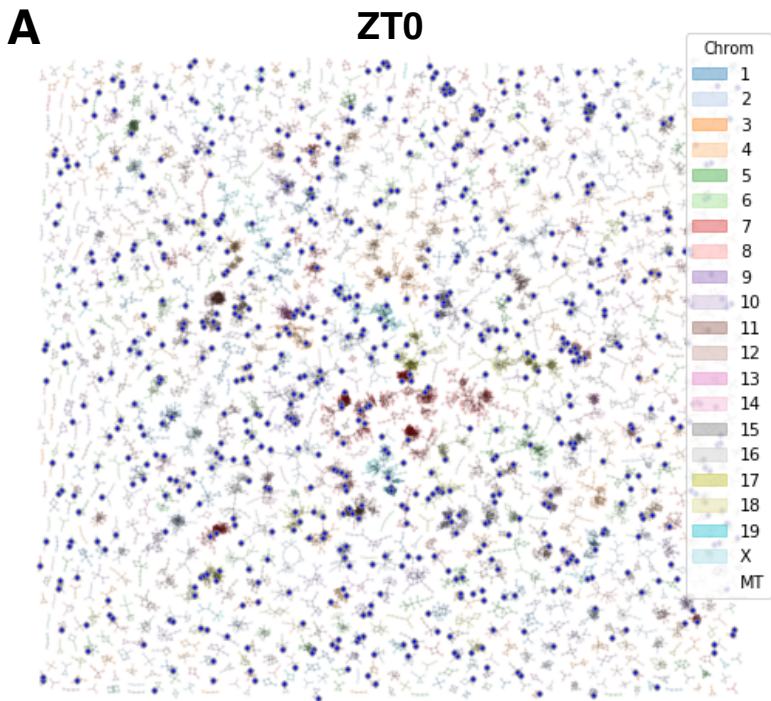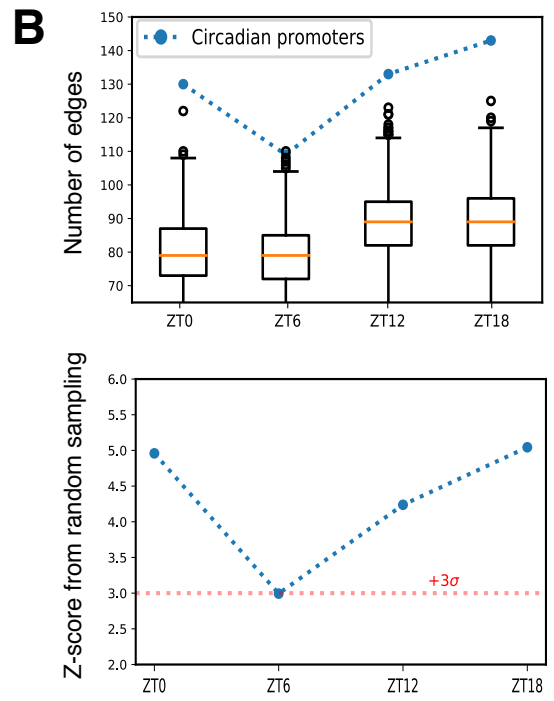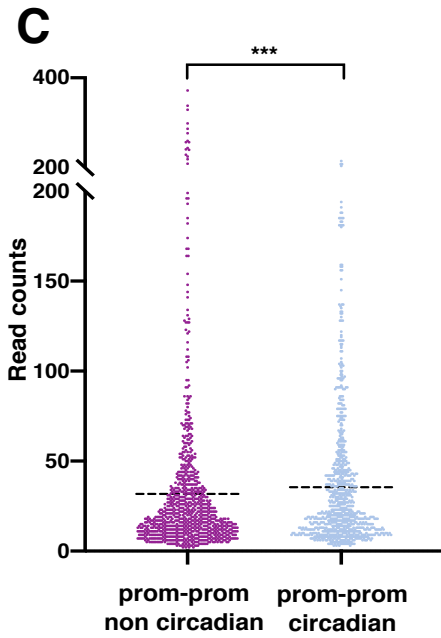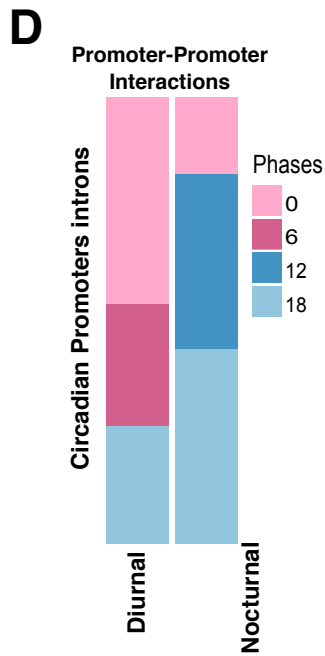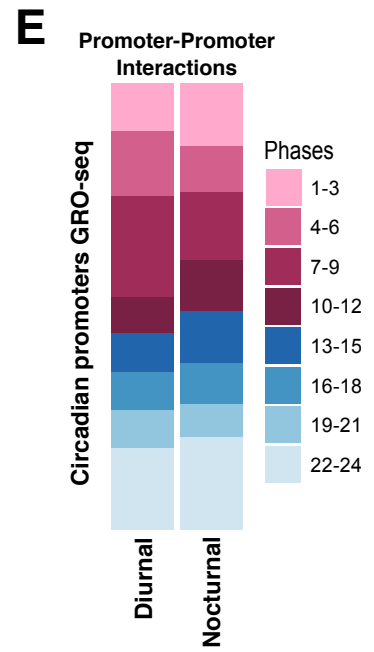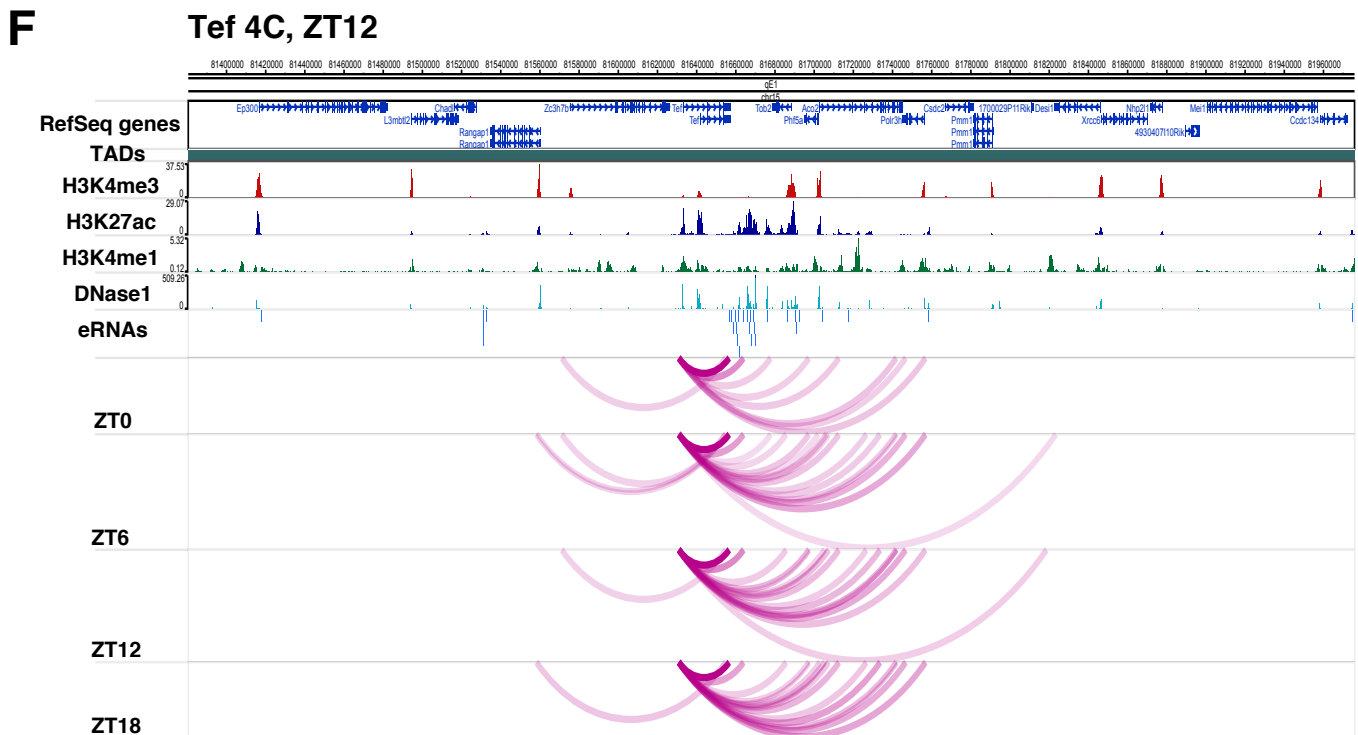

Supplement: 13059_2021_2374_MOESM6_ESM.pdf [file 13059_2021_2374_MOESM6_ESM.pdf]
