# Supplementary material for: The global and promoter-centric 3D genome organization temporally resolved during a circadian cycle
Source: PubMed Central journal article supplement (PMC8185950; doi:10.1186/s13059-021-02374-3), 2021-06-08

### A Rorc 4C, ZT18

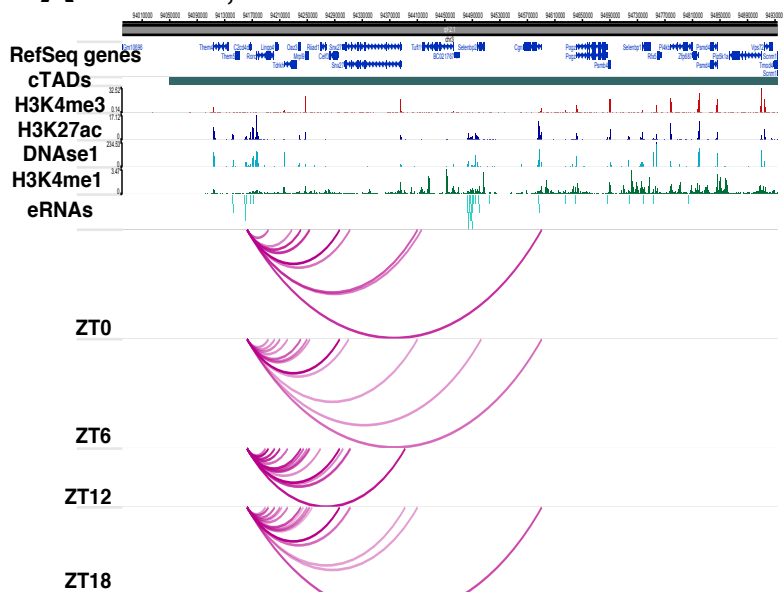

### B Npas2 4C, ZT0

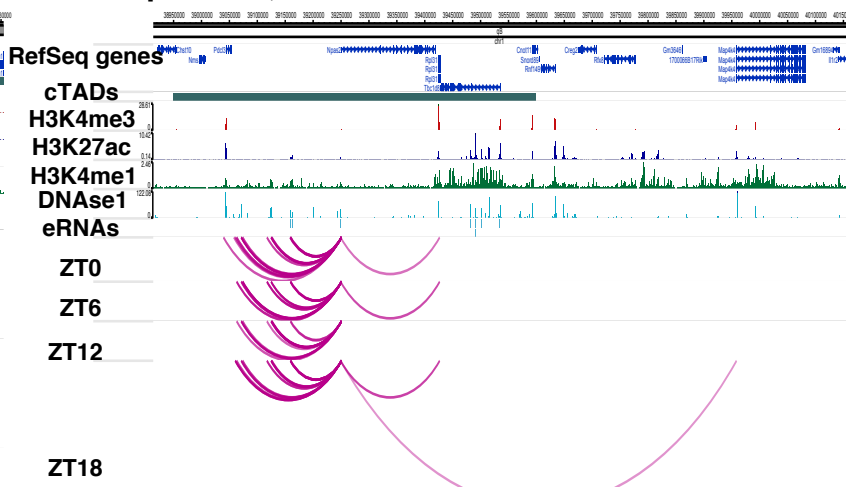

### C Nr1d2 4C, ZT12

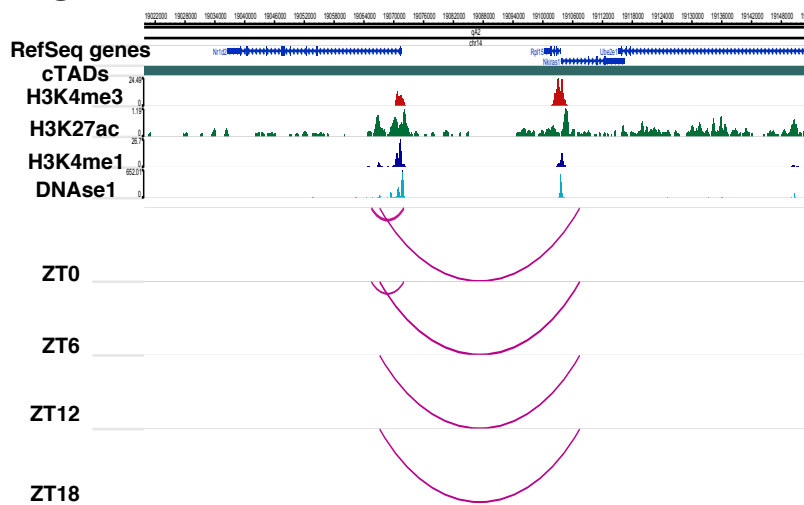

### D Per2 4C, ZT18

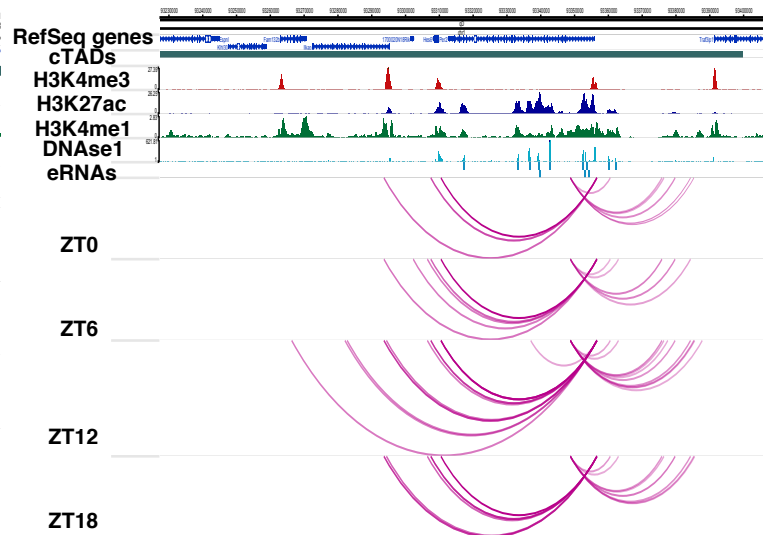

### E Dhr3 4C, ZT0

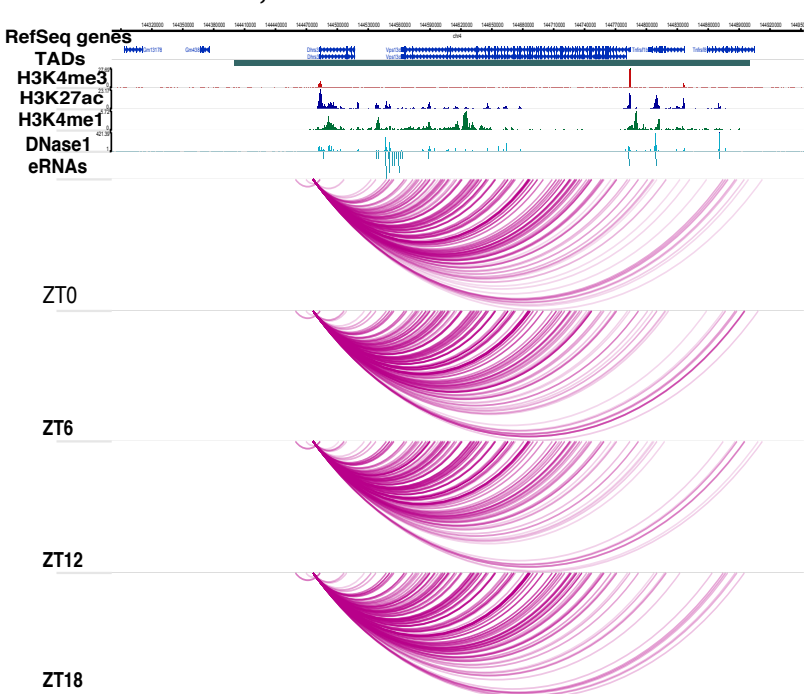

### F Ppp1r3c 4C, ZT0

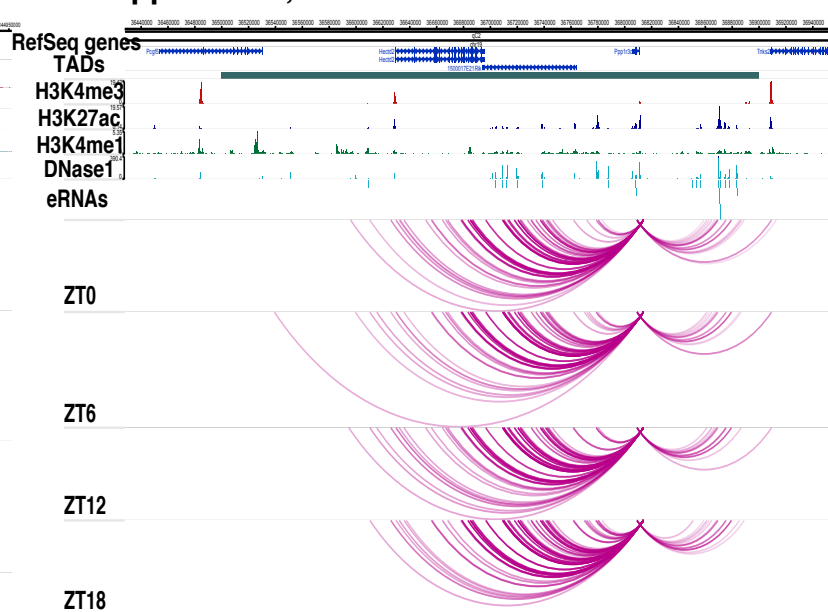

Supplement: 13059_2021_2374_MOESM7_ESM.pdf [file 13059_2021_2374_MOESM7_ESM.pdf]
